# Supplementary material
Source: PubMed Central journal article supplement (PMC539745)

**A**

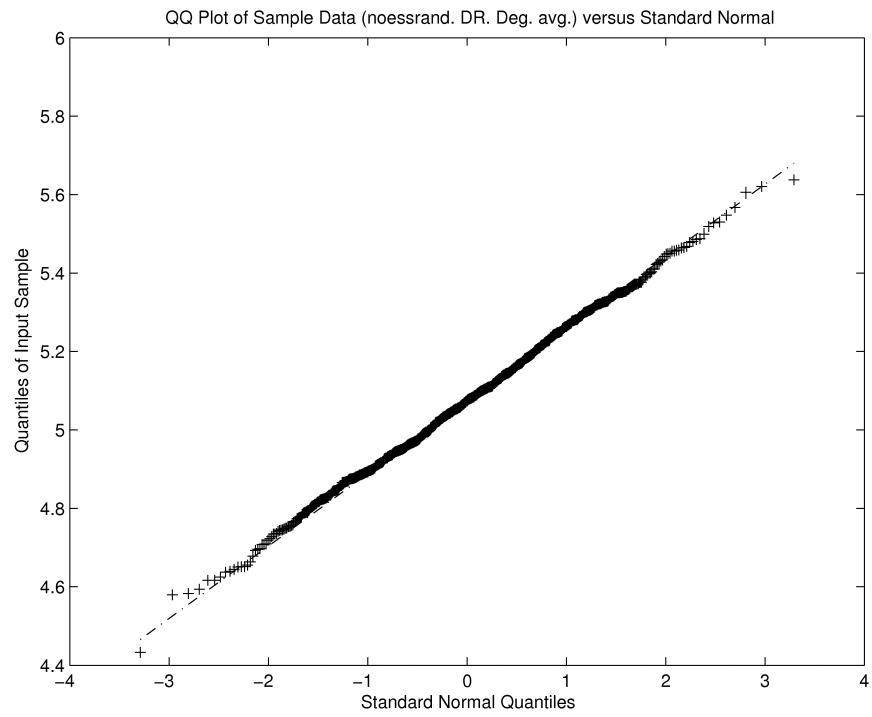

**B**

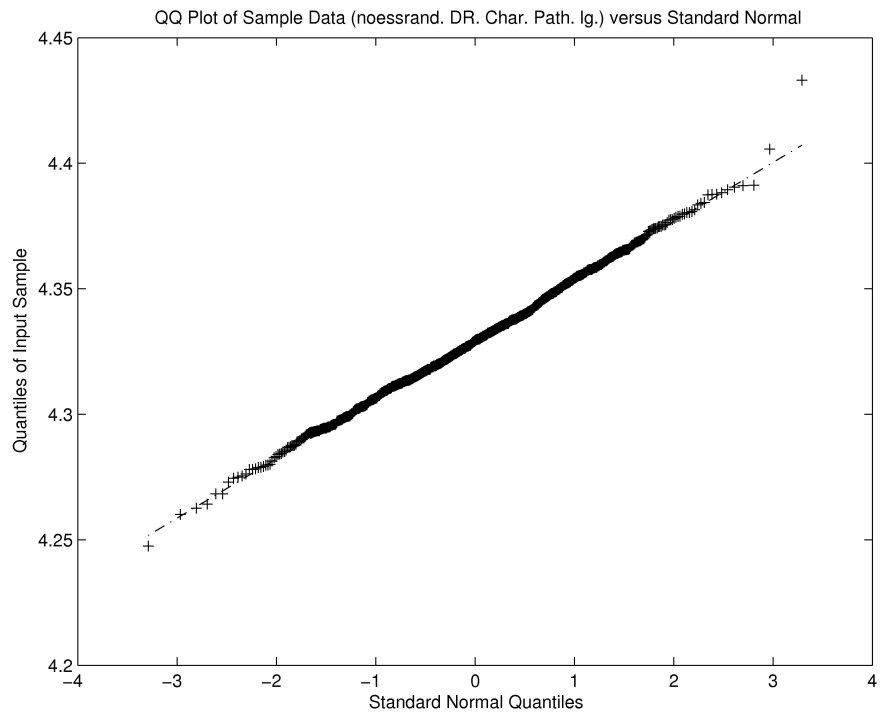

**C**

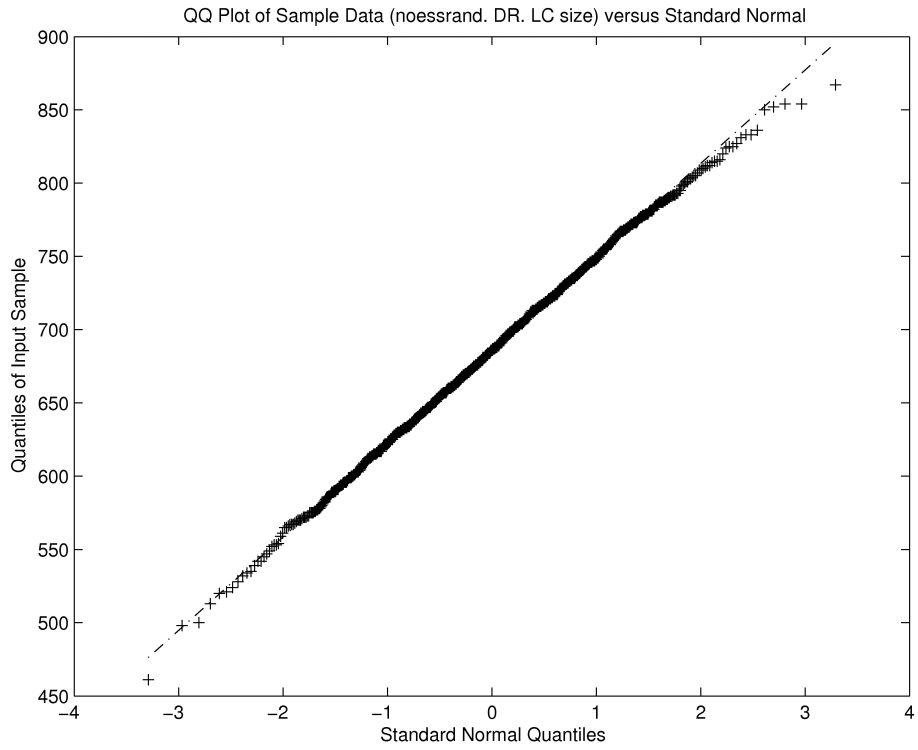

**D**

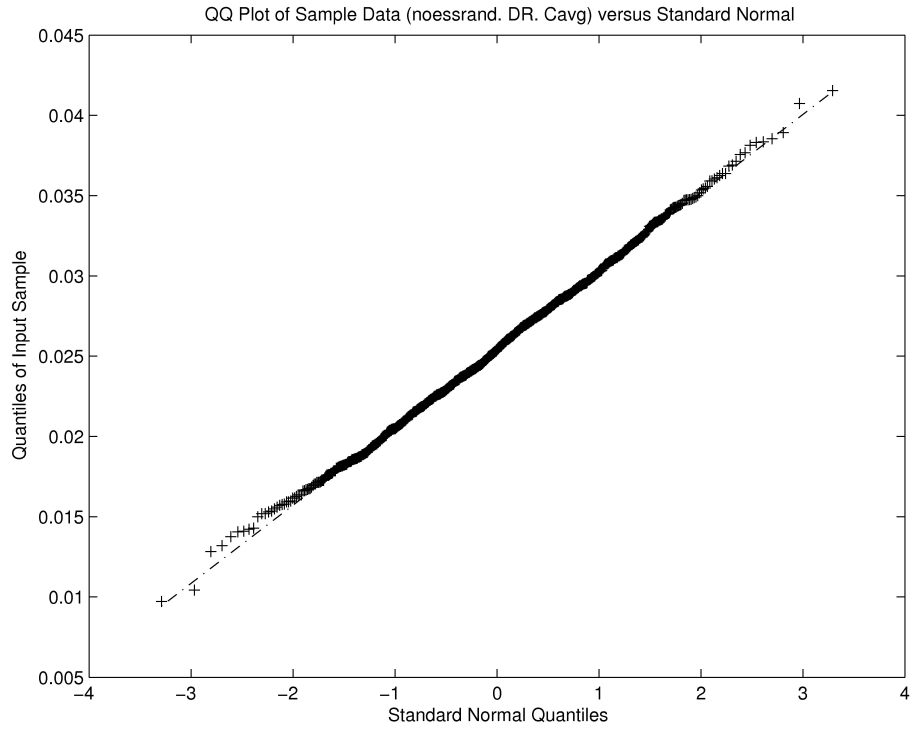

**E**

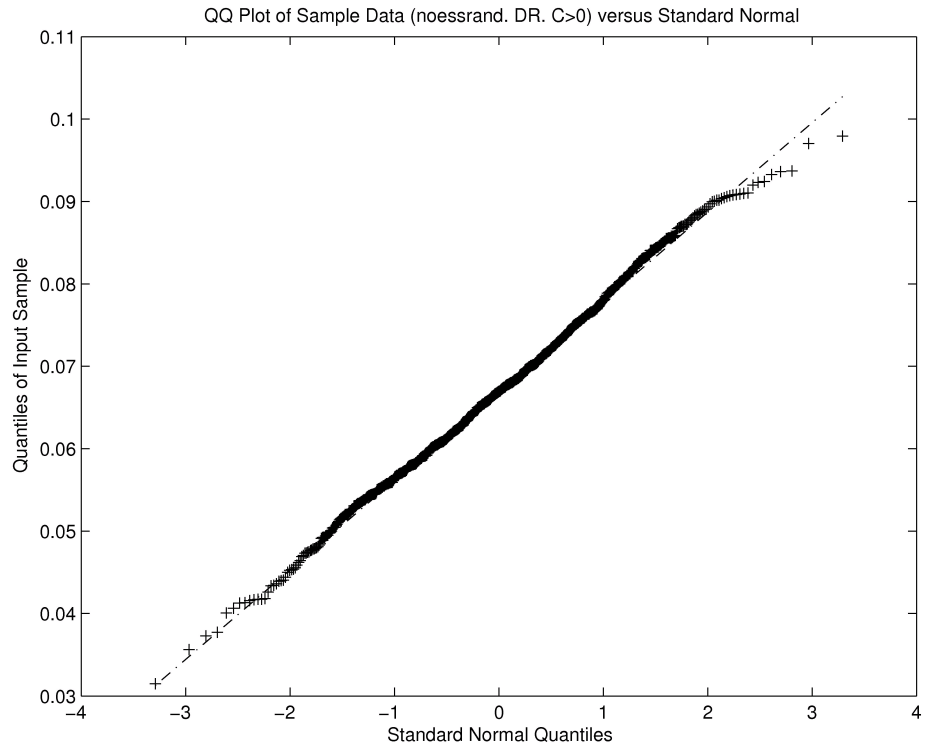

**F**

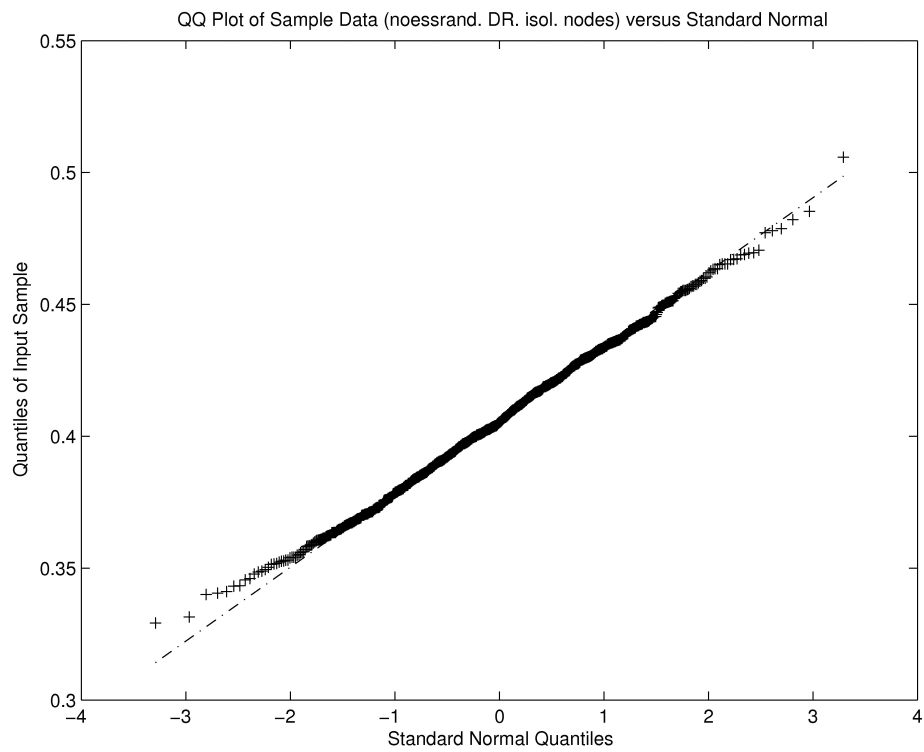

Supplement: pnas_101_52_18006__10.pdf [file pnas_101_52_18006__10.pdf]

**A**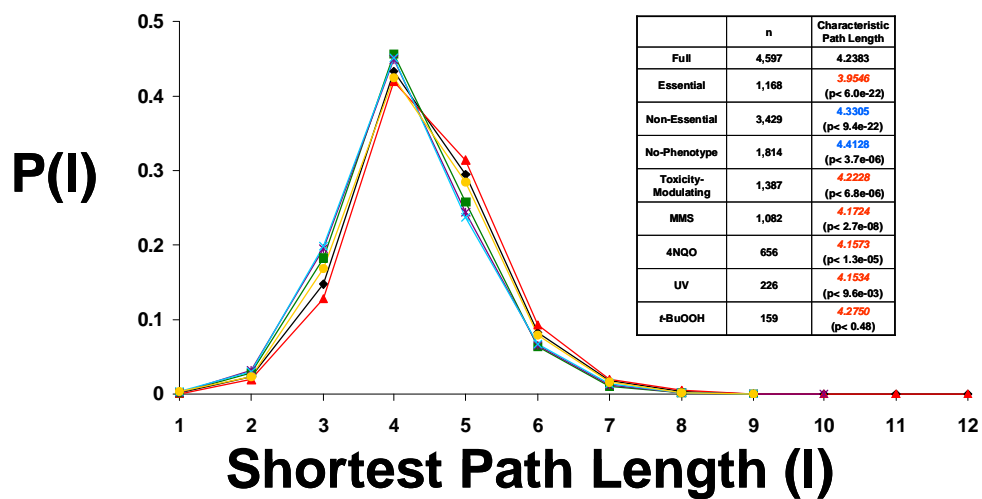**B**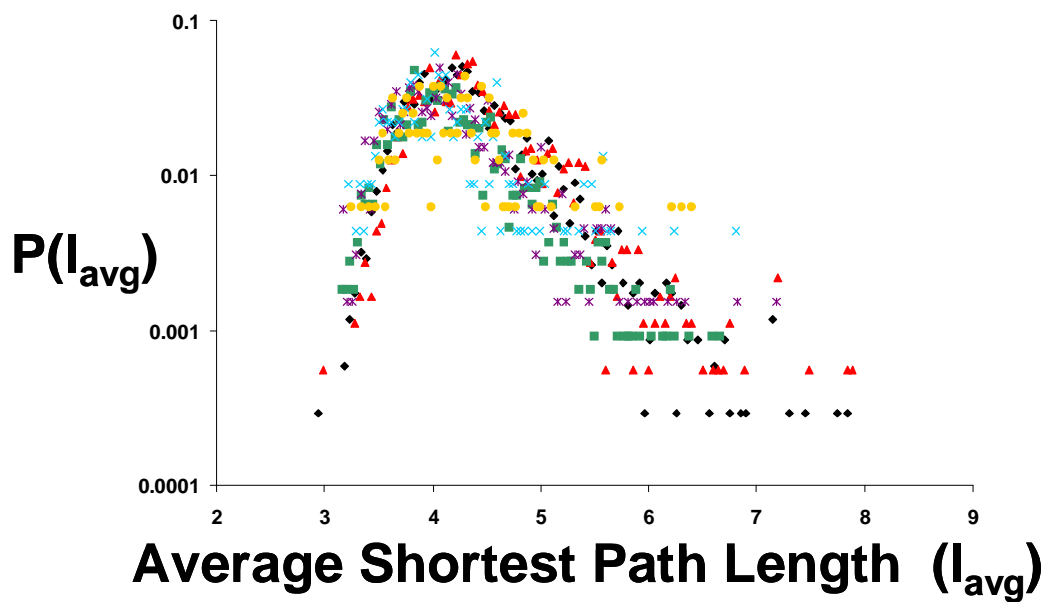

Supplement: pnas_101_52_18006__7.pdf [file pnas_101_52_18006__7.pdf]

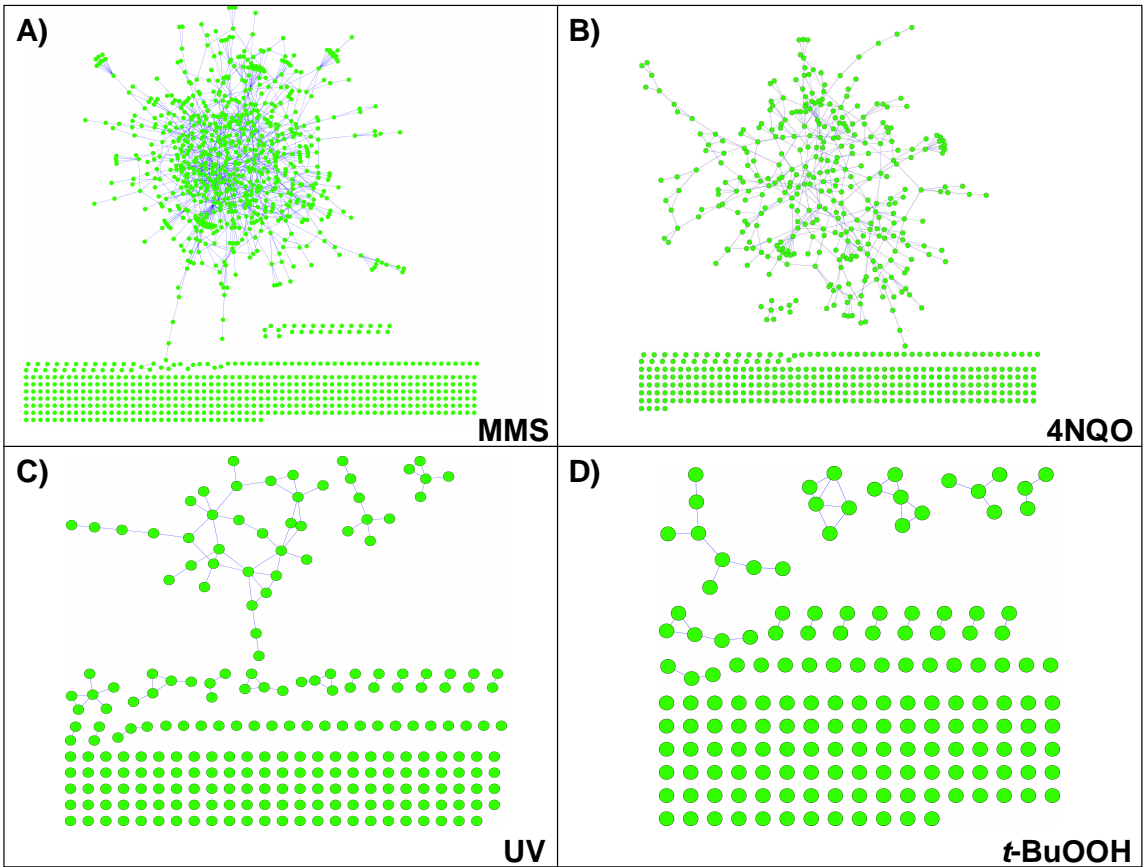

Supplement: pnas_101_52_18006__8.pdf [file pnas_101_52_18006__8.pdf]

A

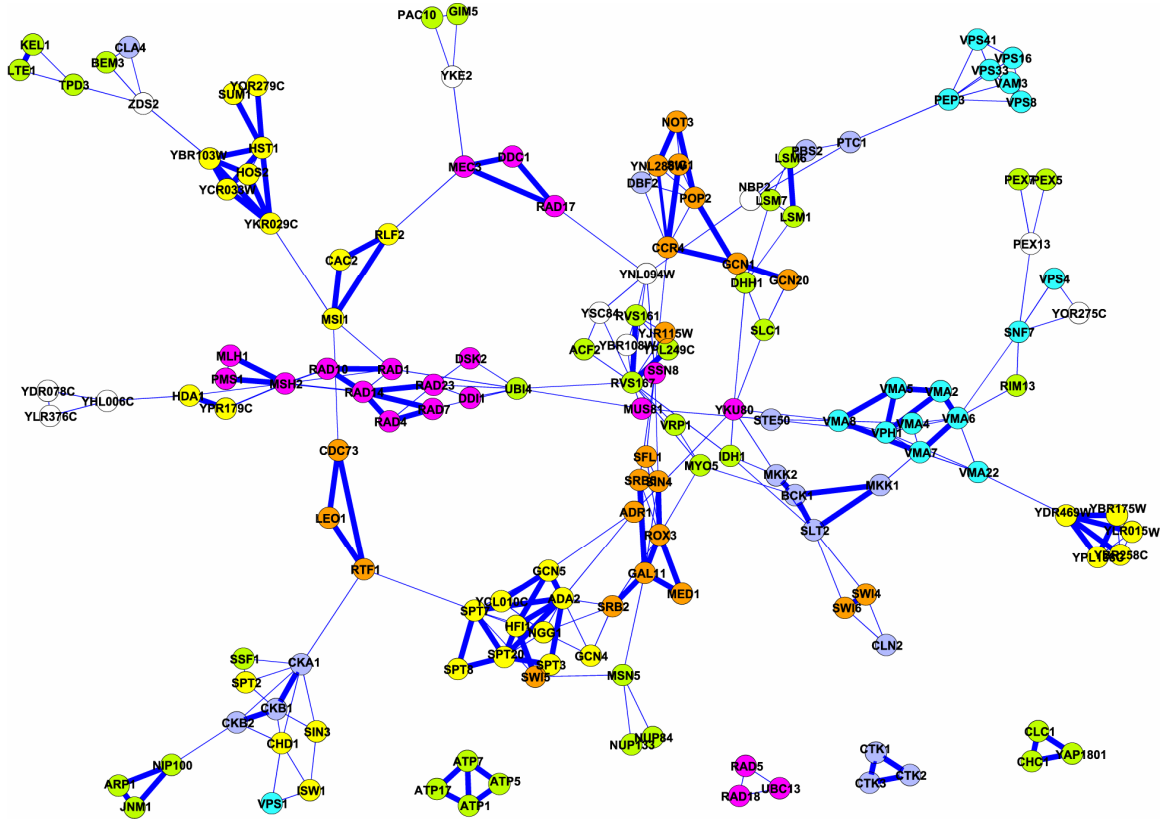

B

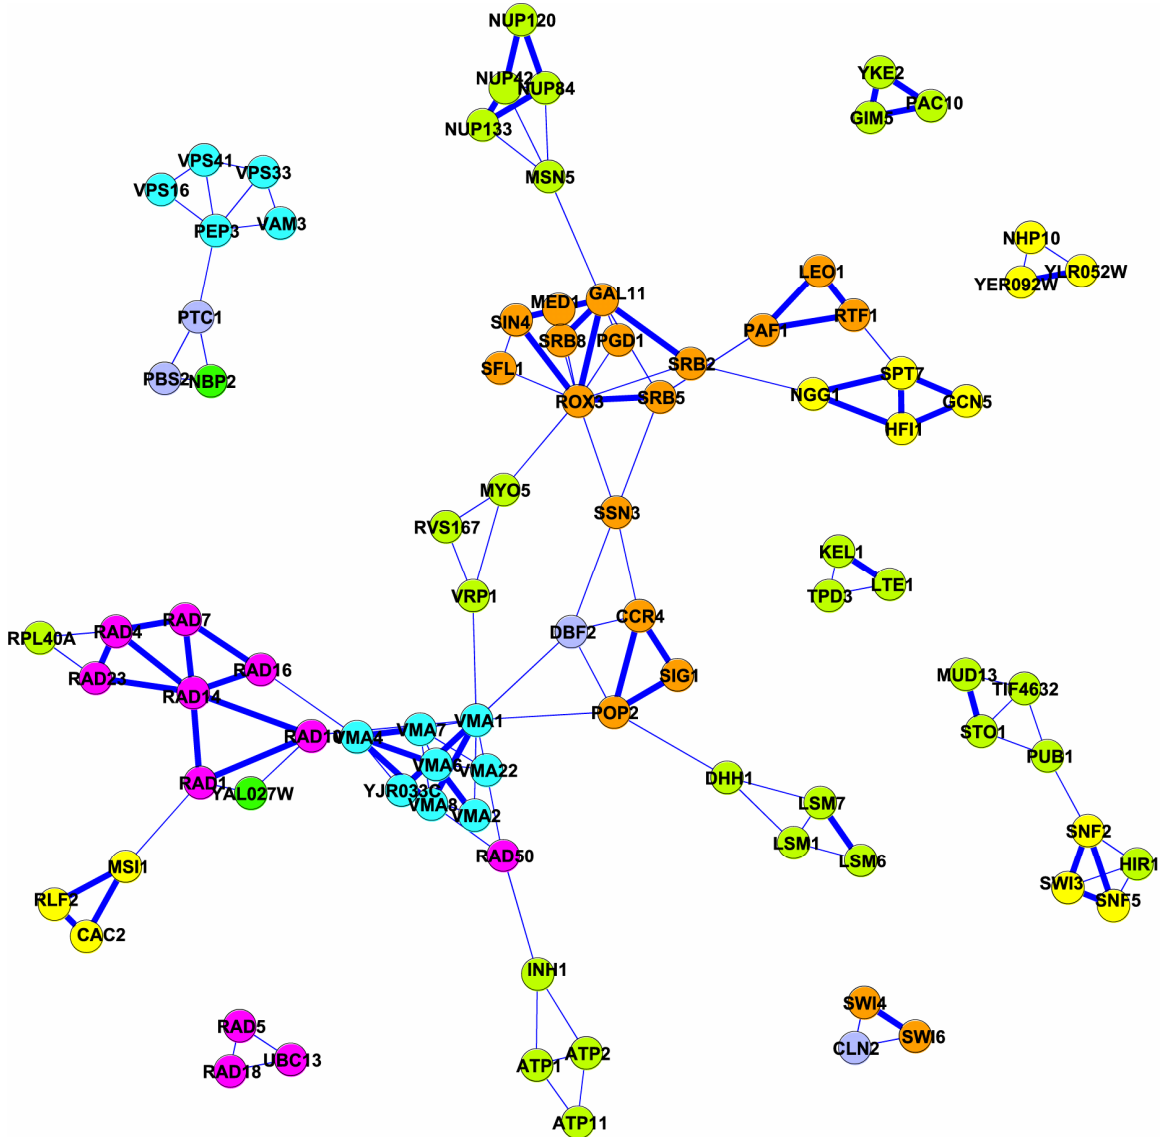

C

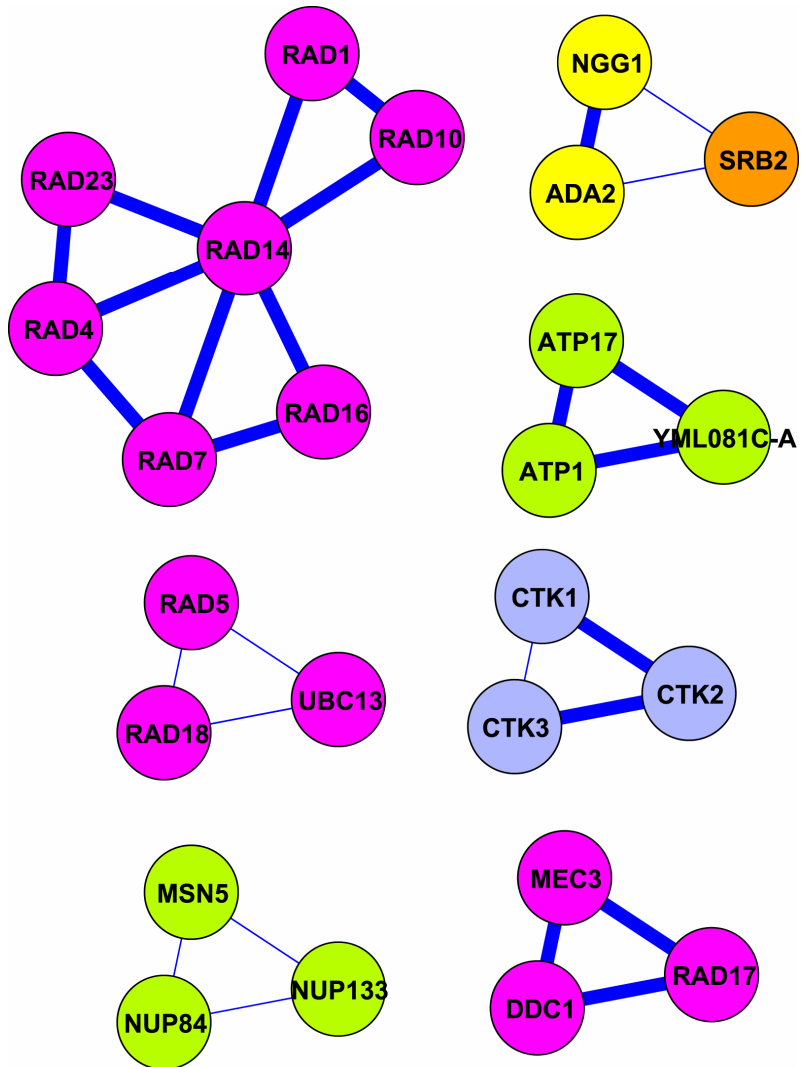

D

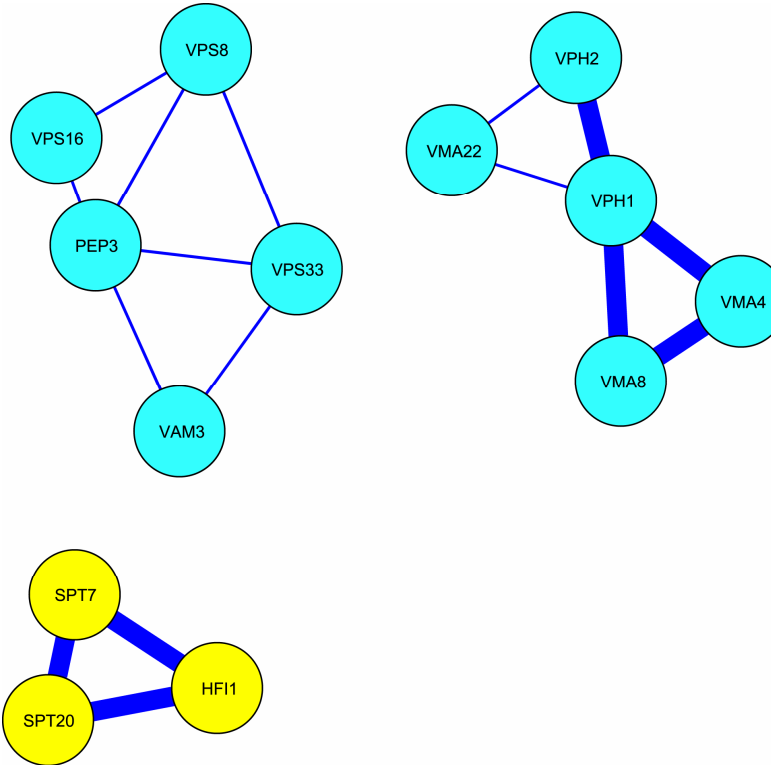

Supplement: pnas_101_52_18006__9.pdf [file pnas_101_52_18006__9.pdf]
